# Supplementary material for: Deep-learning based detection of COVID-19 using lung ultrasound imagery
Source: PLoS One. 2021 Aug 13;16(8):e0255886. doi: 10.1371/journal.pone.0255886 (PMC8363024; doi:10.1371/journal.pone.0255886)
Supplement: S1 File — Number of images utilized in training and validation sets for each of the 5-fold cross-validation experiments. (XLSX) [file pone.0255886.s001.xlsx]

## Sheet: images
Number of images utilized in training and validation sets for each of the 5-fold cross-validation experiments.
			Covid-19	Pneumonia	Healthy	Training	Validation
	1x5-fold cross-validation	fold1	278	157	269	2622	704
		fold2	254	133	259	2680	646
		fold3	275	170	272	2609	717
		fold4	251	138	288	2649	677
		fold5	225	133	224	2744	582
	2x5-fold cross-validation	fold1	209	143	254	2720	606
		fold2	240	132	262	2692	634
		fold3	321	148	304	2553	773
		fold4	254	172	272	2628	698
		fold5	259	136	220	2711	615
	3x5-fold cross-validation	fold1	238	140	293	2655	671
		fold2	261	141	261	2663	663
		fold3	246	152	234	2694	632
		fold4	273	149	277	2627	699
		fold5	265	149	247	2665	661
	4x5-fold cross-validation	fold1	268	145	246	2667	659
		fold2	299	161	213	2653	673
		fold3	195	137	268	2726	600
		fold4	295	120	312	2599	727
		fold5	226	168	273	2659	667
	5x5-fold cross-validation	fold1	271	167	312	2576	750
		fold2	267	132	264	2663	663
		fold3	266	134	254	2672	654
		fold4	251	136	215	2724	602
		fold5	228	162	267	2669	657
	Average		256.6	146.2	262.4	2660.8	665.2
